# Supplementary material for: Unveiling protein corona formation around self-propelled enzyme nanomotors by nanoscopy
Source: Royal Society of Chemistry journal article supplement (doi:10.1039/d3nr03749e), 2023-11-16
Supplement: d3nr03749e1.pdf [file d3nr03749e1.pdf]

## Supporting information for

### Unveiling protein corona formation around self-propelled enzyme nanomotors by nanoscopy

Tania Patiño,<sup>\*,†a,b</sup> Joaquin Llacer-Wintle<sup>†a</sup>, Sílvia Pujals<sup>a</sup>, Lorenzo Albertazzi,<sup>a,b\*</sup> Samuel Sánchez<sup>a,c\*</sup>

<sup>a</sup> Institute for Bioengineering of Catalonia (IBEC), The Barcelona Institute of Science and Technology (BIST), Baldori i Reixac 10-12, 08028

<sup>b</sup> Biomedical Engineering Department, Institute for Complex Molecular Systems. Technische Universiteit Eindhoven; Het Kranenveld 14, 5612 AZ Eindhoven The Netherlands.

<sup>c</sup> Institució Catalana de Recerca i Estudis Avançats (ICREA), Pg. Lluís Companys 23, Barcelona, 08010, Spain.

<sup>†</sup> These Authors contributed equally.

Electronic Supplementary Information (ESI) available: Additional experimental section and proteomic results (PDF)

#### Table of Contents

|                |   |
|----------------|---|
| FIGURES.....   | 1 |
| Figure S1..... | 1 |
| Figure S2..... | 2 |
| Figure S3..... | 3 |
| Figure S4..... | 3 |

#### FIGURES

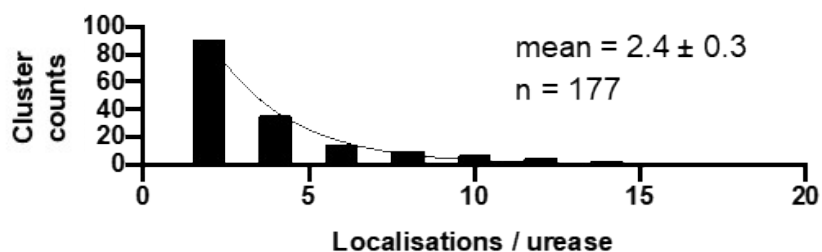

Figure S1. A control experiment to estimate the number of localisations recorded per single labelled urease, i.e. the duty cycle. Cy5-labelled urease was diluted until single molecules could be resolved and their individual blinking events determined. The mean value is estimated from an exponential distribution fitting.

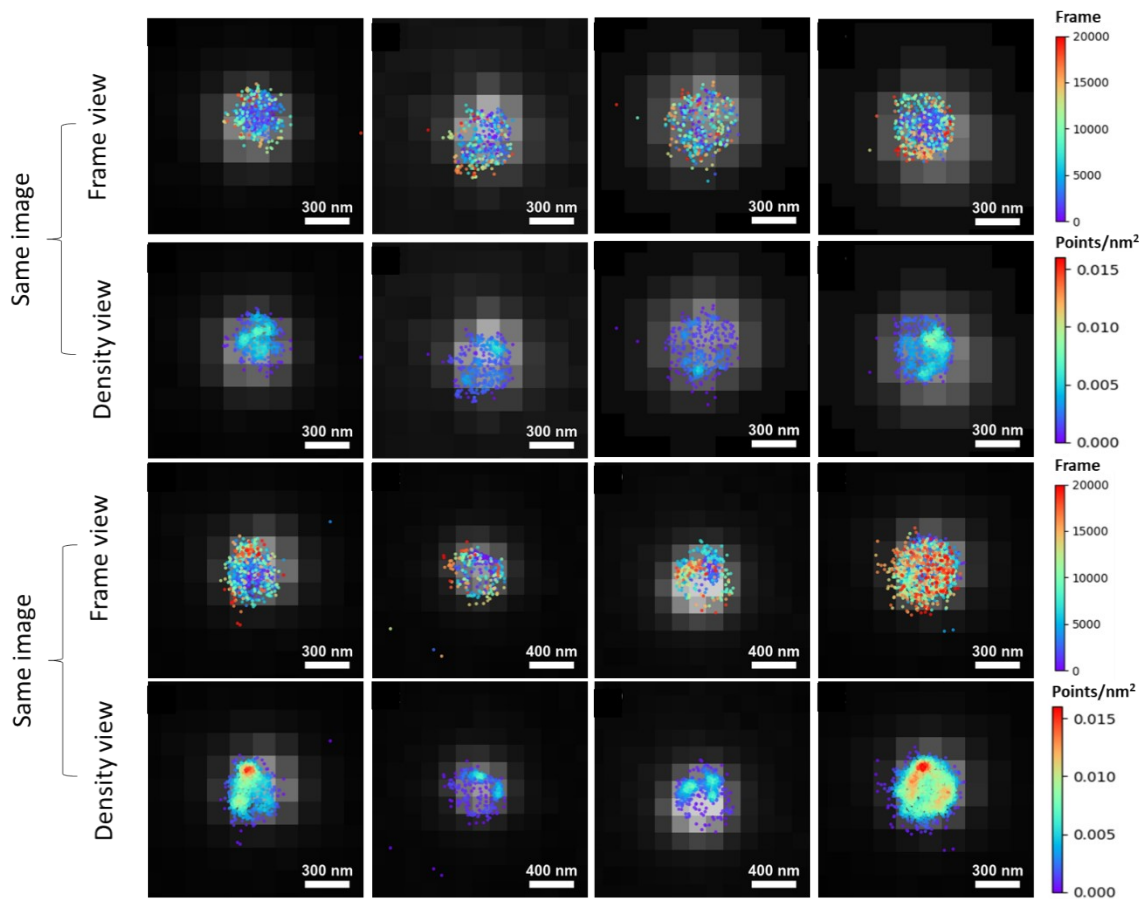

Figure S2. STORM images illustrating the urease distribution on nanomotors.

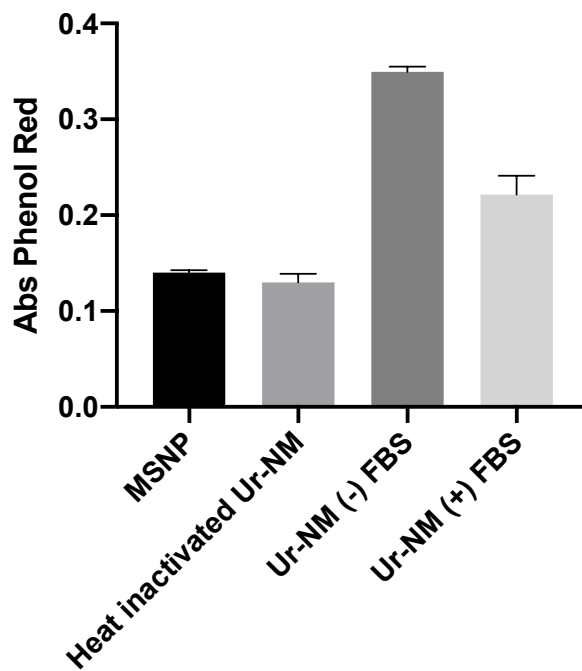

Figure S3. Measurement of urease nanomotors (Ur-NM) activity upon exposure to FBS, where we measured phenol red absorbance at 560 nm of 1) mesoporous silica nanoparticles (MSNP), 2) heat inactivated Ur-NM by exposing the nanomotors for 1 h at 42 degree, 3) Ur-NM at the same experimental conditions for protein corona analysis, without adding FBS to the media (Ur-NM (-) FBS) and 4) ur-NM exposed to the same experimental conditions as in protein corona formation and analysis (Ur-NM (+) FBS).

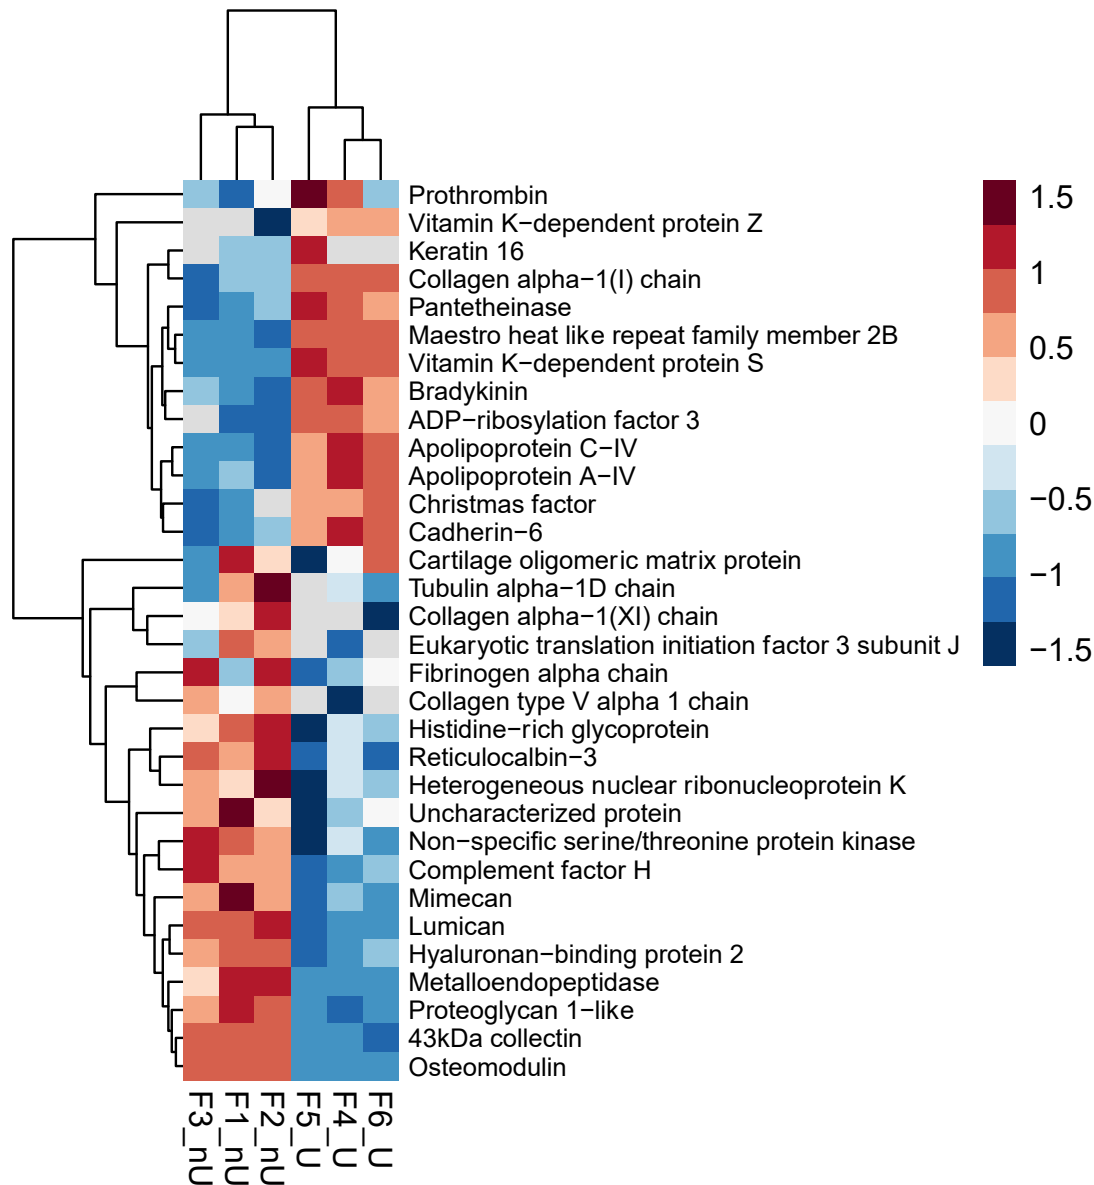

Figure S4. Heatmap of significant proteins ( $|FC| > 1.5$  and  $p < 0.05$ ) for the comparisons analyzed. Each protein is represented by a row of colored tiles (red, up-regulated; blue, down-regulated).
